# Supplementary material
Source: ML conference proceedings conference paper supplement (https://proceedings.mlr.press/v161/li21a.html)
Supplement: Supplementary file [file li21a-supp.pdf]

# Tractable Computation of Expected Kernels (Supplementary material)

Wenzhe Li<sup>\*1</sup>

Zhe Zeng<sup>\*2</sup>

Antonio Vergari<sup>2</sup>

Guy Van den Broeck<sup>2</sup>

<sup>1</sup>Tsinghua University

<sup>2</sup>University of California, Los Angeles

scott.wenzhe.li@gmail.com, {zhezeng, aver, guyvdb}@cs.ucla.edu

## 1 PROOFS

We first present another hardness result about the computation of expected kernels besides Theorem 2.2.

**Theorem 1.1.** *There exist representations of distributions  $p$  and  $q$  that are smooth and compatible, yet computing the expected kernel of a simple kernel  $k$  that is the Kronecker delta is already #P-hard.*

*Proof.* (an alternative proof to the one in Section 4) Consider the case when the positive definite kernel  $k$  is a Kronecker delta function defined as  $k(\mathbf{x}, \mathbf{x}') = 1$  if and only if  $\mathbf{x} = \mathbf{x}'$ . Moreover, assume that the probabilistic circuit  $p$  is smooth and decomposable, and that  $q = p$ . Then computing the expected kernel is equivalent to computing the power of a probabilistic circuit  $p$ , that is,  $M_k(p, q) = \sum_{\mathbf{x} \in \mathcal{X}} p^2(\mathbf{x})$  with  $\mathcal{X}$  being the domain of variables  $\mathbf{X}$ . Vergari et al. [2021] proves that the task of computing  $\sum_{\mathbf{x} \in \mathcal{X}} p^2(\mathbf{x})$  is #P-hard even when the PC  $p$  is smooth and decomposable, which concludes our proof.  $\square$

**Proposition 4.4** Let  $p_n$  and  $q_m$  be two compatible probabilistic circuits over variables  $\mathbf{X}$  whose output units  $n$  and  $m$  are sum units, denoted by  $p_n(\mathbf{X}) = \sum_{i \in \text{in}(n)} \theta_i p_i(\mathbf{X})$  and  $q_m(\mathbf{X}) = \sum_{j \in \text{in}(m)} \delta_j q_j(\mathbf{X})$  respectively. Let  $k_l$  be a kernel circuit with its output unit being a sum unit  $l$ , denoted by  $k_l(\mathbf{X}) = \sum_{c \in \text{in}(l)} \gamma_c k_c(\mathbf{X})$ . Then it holds that

$$M_{k_l}(p_n, q_m) = \sum_{i \in \text{in}(n)} \theta_i \sum_{j \in \text{in}(m)} \delta_j \sum_{c \in \text{in}(l)} \gamma_c M_{k_c}(p_i, q_j). \quad (1)$$

<sup>\*</sup>Authors contributed equally. This research was performed while W.L. was visiting UCLA remotely.

*Proof.*  $M_{k_l}(p_n, q_m)$  can be expanded as

$$\begin{aligned} & M_{k_l}(p_n, q_m) \\ &= \sum_{\mathbf{x}} \sum_{\mathbf{x}'} p_n(\mathbf{x}) q_m(\mathbf{x}') k_l(\mathbf{x}, \mathbf{x}') \\ &= \sum_{\mathbf{x}} \sum_{\mathbf{x}'} \sum_{i \in \text{in}(n)} \theta_i p_i(\mathbf{x}) \sum_{j \in \text{in}(m)} \delta_j q_j(\mathbf{x}') \sum_{c \in \text{in}(l)} \gamma_c k_c(\mathbf{x}, \mathbf{x}') \\ &= \sum_{i \in \text{in}(n)} \theta_i \sum_{j \in \text{in}(m)} \delta_j \sum_{c \in \text{in}(l)} \gamma_c M_{k_c}(p_i, q_j). \end{aligned}$$

$\square$

**Proposition 4.5** Let  $p_n$  and  $q_m$  be two compatible probabilistic circuits over variables  $\mathbf{X}$  whose output units  $n$  and  $m$  are product units, denoted by  $p_n(\mathbf{X}) = p_{n_L}(\mathbf{X}_L) p_{n_R}(\mathbf{X}_R)$  and  $q_m(\mathbf{X}) = q_{m_L}(\mathbf{X}_L) q_{m_R}(\mathbf{X}_R)$ . Let  $k$  be a kernel circuit that is kernel-compatible with the circuit pair  $p_n$  and  $q_m$  with its output unit being a product unit denoted by  $k(\mathbf{X}, \mathbf{X}') = k_L(\mathbf{X}_L, \mathbf{X}'_L) k_R(\mathbf{X}_R, \mathbf{X}'_R)$ . Then it holds that

$$M_k(p_n, q_m) = M_{k_L}(p_{n_L}, q_{m_L}) \cdot M_{k_R}(p_{n_R}, q_{m_R}).$$

*Proof.*  $M_k(p_n, q_m)$  can be expanded as

$$\begin{aligned} & M_k(p_n, q_m) \\ &= \sum_{\mathbf{x}} \sum_{\mathbf{x}'} p_n(\mathbf{x}) q_m(\mathbf{x}') k(\mathbf{x}, \mathbf{x}') \\ &= \sum_{\mathbf{x}} \sum_{\mathbf{x}'} p_{n_L}(\mathbf{x}_L) p_{n_R}(\mathbf{x}_R) q_{m_L}(\mathbf{x}'_L) q_{m_R}(\mathbf{x}'_R) k_L(\mathbf{x}_L, \mathbf{x}'_L) k_R(\mathbf{x}_R, \mathbf{x}'_R) \\ &= M_{k_L}(p_{n_L}, q_{m_L}) \cdot M_{k_R}(p_{n_R}, q_{m_R}). \end{aligned}$$

$\square$

**Corollary 4.6.** Following the assumptions in Theorem 4.3, the squared maximum mean discrepancy  $MMD[\mathcal{H}, p, q]$  in RKHS  $\mathcal{H}$  associated with kernel  $k$  as defined in Gretton et al. [2012] can be tractably computed.

*Proof.* This is an immediate result following Theorem 4.3 by rewriting MMD as defined in Gretton et al. [2012] in the form of a linear combination of expected kernels, that is,  $MMD^2[\mathcal{H}, p, q] = M_k(p, p) + M_k(q, q) - 2M_k(p, q)$ .  $\square$

**Corollary 4.7.** Following the assumptions in Theorem 4.3, if the probabilistic circuit  $p$  further satisfies determinism, the kernelized discrete Stein discrepancy (KDSD)  $\mathbb{D}^2(q \parallel p) = \mathbb{E}_{\mathbf{x}, \mathbf{x}' \sim q}[k_p(\mathbf{x}, \mathbf{x}')] in the RKHS associated with kernel  $k$  as defined in Yang et al. [2018] can be tractably computed.$

Before showing the proof for Corollary 4.7, we first give definitions that are necessary for defining KDSD as follows to be self-contained.

**Definition 1.2** (Cyclic permutation). *For a finite set  $\mathcal{X}$  and  $D = |\mathcal{X}|$ , a cyclic permutation  $\neg : \mathcal{X} \rightarrow \mathcal{X}$  is a bijective function such that for some ordering  $a_1, a_2, \dots, a_D$  of the elements in  $\mathcal{X}$ ,  $\neg a_i = a_{(i+1) \bmod D}$ ,  $\forall i = 1, 2, \dots, D$ .*

**Definition 1.3** (Partial difference operator). *For any function  $f : \mathcal{X} \rightarrow \mathbb{R}$  with  $D = |\mathcal{X}|$ , the partial difference operator is defined as*

$$\Delta_i^* f(\mathbf{X}) := f(\mathbf{X}) - f(\neg_i \mathbf{X}), \forall i = 1, \dots, D, \quad (2)$$

with  $\neg_i \mathbf{X} := (X_1, \dots, \neg X_i, \dots, X_D)$ . Moreover, the difference operator is defined as  $\Delta^* f(\mathbf{X}) := (\Delta_1^* f(\mathbf{X}), \dots, \Delta_D^* f(\mathbf{X}))$ . Similarly, let  $\neg$  be the inverse permutation of  $\neg$ , and  $\Delta$  denote the difference operator defined with respect to  $\neg$ , i.e.,

$$\Delta_i f(\mathbf{X}) := f(\mathbf{X}) - f(\neg_i \mathbf{X}), i = 1, \dots, D.$$

**Definition 1.4** (Difference score function). *The (difference) score function is defined as  $s_p(\mathbf{X}) := \frac{\Delta^* p(\mathbf{X})}{p(\mathbf{X})}$  on domain  $\mathcal{X}$  with  $D = |\mathcal{X}|$ , a vector-valued function with its  $i$ -th dimension being*

$$s_{p,i}(\mathbf{X}) := \frac{\Delta_i^* p(\mathbf{X})}{p(\mathbf{X})} = 1 - \frac{p(\neg_i \mathbf{X})}{p(\mathbf{X})}, i = 1, 2, \dots, D. \quad (3)$$

Given the above definitions, the discrete Stein discrepancy between two distributions  $p$  and  $q$  is defined as

$$\mathbb{D}(q \parallel p) := \sup_{\mathbf{f} \in \mathcal{H}} \mathbb{E}_{\mathbf{x} \sim q(\mathbf{x})} [\mathcal{T}_p \mathbf{f}(\mathbf{x})], \quad (4)$$

where  $\mathbf{f} : \mathcal{X} \rightarrow \mathbb{R}^D$  is a test function, belonging to some function space  $\mathcal{H}$  and  $\mathcal{T}_p$  is the so-called Stein difference operator, which is defined as

$$\mathcal{T}_p \mathbf{f} = s_p(\mathbf{x}) \mathbf{f}^\top - \Delta \mathbf{f}(\mathbf{x}). \quad (5)$$

If the function space  $\mathcal{H}$  is an reproducing kernel Hilbert space (RKHS) on  $\mathcal{X}$  equipped with a kernel function  $k(\cdot, \cdot)$ ,

then a kernelized discrete Stein discrepancy (KDSD) is defined and admits a closed-form representation as

$$\mathbb{S}(q \parallel p) := \mathbb{D}^2(q \parallel p) = \mathbb{E}_{\mathbf{x}, \mathbf{x}' \sim q}[k_p(\mathbf{x}, \mathbf{x}')]. \quad (6)$$

Here, the kernel function  $k_p$  is defined as

$$k_p(\mathbf{x}, \mathbf{x}') = s_p(\mathbf{x})^\top k(\mathbf{x}, \mathbf{x}') s_p(\mathbf{x}') - s_p(\mathbf{x})^\top \Delta^{\mathbf{x}'} k(\mathbf{x}, \mathbf{x}') - \Delta^{\mathbf{x}} k(\mathbf{x}, \mathbf{x}')^\top s_p(\mathbf{x}') + \text{tr}(\Delta^{\mathbf{x}, \mathbf{x}'} k(\mathbf{x}, \mathbf{x}')),$$

where the difference operator  $\Delta^{\mathbf{x}}$  is as in Definition 1.3. The superscript  $\mathbf{x}$  specifies the variables that it operates on.

*Proof.* [Corollary 4.7] By the definition of difference score functions, the close form of KDSD can be further rewritten as follows.

$$\begin{aligned} & \mathbb{E}_{\mathbf{x}, \mathbf{x}' \sim q}[k_p(\mathbf{x}, \mathbf{x}')] \\ &= \sum_{i=1}^D \mathbb{E}_{\mathbf{x}, \mathbf{x}' \sim q} \left[ \frac{p(\neg_i \mathbf{x}) p(\neg_i \mathbf{x}')}{p(\mathbf{x}) p(\mathbf{x}')} k(\mathbf{x}, \mathbf{x}') - \frac{p(\neg_i \mathbf{x})}{p(\mathbf{x})} k(\mathbf{x}, \neg_i \mathbf{x}') \right. \\ & \quad \left. - \frac{p(\neg_i \mathbf{x}')}{p(\mathbf{x}')} k(\neg_i \mathbf{x}, \mathbf{x}') + k(\neg_i \mathbf{x}, \neg_i \mathbf{x}') \right] \\ &= \sum_{i=1}^D [M_k(q \frac{\tilde{p}_i}{p}, q \frac{\tilde{p}_i}{p}) - M_k(q \frac{\tilde{p}_i}{p}, \tilde{q}_i) \\ & \quad - M_k(\tilde{q}_i, q \frac{\tilde{p}_i}{p}) + M_k(\tilde{q}_i, \tilde{q}_i)] \end{aligned} \quad (7)$$

where  $D$  denotes the cardinality of the domain of variables  $\mathbf{X}$ , the probability  $\tilde{p}_i(\mathbf{X}) := p(\neg_i \mathbf{X})$  and the probability  $\tilde{q}_i(\mathbf{X}) := q(\neg_i \mathbf{X})$ . Notice that the cyclic permutation  $\neg_i$  operates on individual variable and the resulting PC  $\tilde{p}_i$  and  $\tilde{q}_i$  retains the same structure properties as PCs  $p$  and  $q$  respectively. To prove that KDSD can be tractably computed, it suffices to prove that the expected kernel terms in Equation 7 can be tractably computed.

For a deterministic and structured-decomposable PC  $p$ , since PC  $\tilde{p}_i$  retains the same structure, then resulting ratio  $\tilde{p}_i/p$  is again a smooth circuit compatible with  $p$  by Vergari et al. [2021]. Moreover, since PC  $p$  and  $q$  are compatible, the circuit  $\tilde{p}_i/p$  is compatible with PC  $q$ . Thus, the resulting product  $q \frac{\tilde{p}_i}{p}$  is a circuit that is smooth and compatible with both  $p$  and  $q$  by Theorem B.2 and thus compatible with  $\tilde{q}_i$ . By similar arguments, we can verify that all the circuit pair in the expected kernel terms in Equation 7 satisfy the assumptions in Theorem 4.3 and thus they are amenable to the tractable computation we propose in Algorithm 1, which finishes our proof.  $\square$

**Proposition (convergence of Categorical BBIS).** Let  $f(\mathbf{x})$  be a test function. Assume that  $f - \mathbb{E}_p[f] \in \mathcal{H}_p$ , with

$\mathcal{H}_p$  being the RKHS associated with the kernel function  $k_p$ , and  $\sum_i w_i = 1$ , then it holds that

$$\left| \sum_{n=1}^N w_n f(x_n) - \mathbb{E}_p f \right| \leq C_f \sqrt{\mathbb{S}(\{\mathbf{x}^{(n)}, w_n\} \parallel p)},$$

where  $C_f := \|f - \mathbb{E}_p f\|_{\mathcal{H}_p}$ . Moreover, the convergence rate is  $\mathcal{O}(N^{-1/2})$ .

*Proof.* Let  $\hat{f}(\mathbf{x}) := f(\mathbf{x}) - \mathbb{E}_p f$ , then it holds that

$$\begin{aligned} \left| \sum_{n=1}^N w_n f(\mathbf{x}^{(n)}) - \mathbb{E}_p f \right| &= \left| \sum_{n=1}^N w_n \hat{f}(\mathbf{x}^{(n)}) \right| \\ &= \left| \sum_{n=1}^N w_n \langle \hat{f}, k_p(\cdot, \mathbf{x}^{(n)}) \rangle \right| \\ &= \left| \langle \hat{f}, \sum_{n=1}^N w_n k_p(\cdot, \mathbf{x}^{(n)}) \rangle_{\mathcal{H}_p} \right| \\ &\leq \|\hat{f}\|_{\mathcal{H}_p} \cdot \left\| \sum_{n=1}^N w_n k_p(\cdot, \mathbf{x}^{(n)}) \right\|_{\mathcal{H}_p} \\ &= \|\hat{f}\|_{\mathcal{H}_p} \cdot \sqrt{\mathbb{S}(\{\mathbf{x}^{(n)}, w_n\} \parallel p)}. \end{aligned}$$

We further prove the convergence rate of the estimation error by using the importance weights as reference weights. Let  $v_n^* = \frac{1}{n} p(\mathbf{x}^{(n)})/q(\mathbf{x}^{(n)})$ . Then  $\mathbb{S}(\{\mathbf{x}^{(n)}, v_n^*\} \parallel p)$  is a degenerate V-statistics [Liu and Lee, 2017] and it holds that  $\mathbb{S}(\{\mathbf{x}^{(n)}, v_n^*\} \parallel p) = \mathcal{O}(N^{-1})$ . Moreover, we have that  $\sum_{n=1}^N v_n^* = 1 + \mathcal{O}(N^{-1/2})$ , which we denote by  $Z$ , i.e.,  $Z = \sum_{n=1}^N v_n^*$ . Let  $w_n^* = v_n^*/Z$ , then it holds that

$$\mathbb{S}(\{\mathbf{x}^{(n)}, w_n^*\} \parallel p) = \frac{\mathbb{S}(\{\mathbf{x}^{(n)}, v_n^*\} \parallel p)}{Z^2} = \mathcal{O}(N^{-1}).$$

Therefore,

$$\begin{aligned} \left| \sum_{n=1}^N w_n f(\mathbf{x}^{(n)}) - \mathbb{E}_p f \right| &\leq \|\hat{f}\|_{\mathcal{H}_p} \cdot \sqrt{\mathbb{S}(\{\mathbf{x}^{(n)}, w_n\} \parallel p)} \\ &\leq \|\hat{f}\|_{\mathcal{H}_p} \cdot \sqrt{\mathbb{S}(\{\mathbf{x}^{(n)}, w_n^*\} \parallel p)} \\ &= \mathcal{O}(N^{-1/2}). \end{aligned}$$

□

**Proposition 5.5.** Let  $p(\mathbf{X}_c \mid \mathbf{x}_s)$  be a PC that encodes a conditional distribution over variables  $\mathbf{X}_c$  conditioned on  $\mathbf{X}_s = \mathbf{x}_s$ , and  $k$  be a KC. If the PC  $p(\mathbf{X}_c \mid \mathbf{x}_s)$  and  $p(\mathbf{X}_c \mid \mathbf{x}_s')$  are compatible and  $k$  is kernel-compatible with the PC pair for any  $\mathbf{x}_s, \mathbf{x}_s'$ , then the conditional kernel function  $k_{p,s}$  as defined in Proposition 5.4 can be tractably computed.

*Proof.* From Proposition 5.4,  $k_{p,s}$  can be written as

$$k_{p,s} = \sum_{i=1}^D \mathbb{E}_{\mathbf{x}_c \sim p(\mathbf{X}_c \mid \mathbf{x}_s), \mathbf{x}_c' \sim p(\mathbf{X}_c \mid \mathbf{x}_s')} [k_{p,i}(\mathbf{x}, \mathbf{x}')],$$

where  $k_{p,i}$  can be expanded as follows.

$$\begin{aligned} k_{p,i}(\mathbf{x}, \mathbf{x}') &= \frac{p(\neg_i \mathbf{x}) p(\neg_i \mathbf{x}')}{p(\mathbf{x}) p(\mathbf{x}')} k(\mathbf{x}, \mathbf{x}') - \frac{p(\neg_i \mathbf{x})}{p(\mathbf{x})} k(\mathbf{x}, \neg_i \mathbf{x}') \\ &\quad - \frac{p(\neg_i \mathbf{x}')}{p(\mathbf{x}')} k(\neg_i \mathbf{x}, \mathbf{x}') + k(\neg_i \mathbf{x}, \neg_i \mathbf{x}'). \end{aligned}$$

for any  $i \in \mathbf{c}$ , given that none of the variables in  $\mathbf{X}_s$  is flipped in the above formulation, kernel  $k_{p,i}$  can be further written as

$$\begin{aligned} k_{p,i}(\mathbf{x}, \mathbf{x}') &= \frac{p(\neg_i \mathbf{x}_c \mid \mathbf{x}_s) p(\neg_i \mathbf{x}_c' \mid \mathbf{x}_s')}{p(\mathbf{x}_c \mid \mathbf{x}_s) p(\mathbf{x}_c' \mid \mathbf{x}_s')} k(\mathbf{x}, \mathbf{x}') \\ &\quad - \frac{p(\neg_i \mathbf{x}_c \mid \mathbf{x}_s)}{p(\mathbf{x}_c \mid \mathbf{x}_s)} k(\mathbf{x}, \neg_i \mathbf{x}') \\ &\quad - \frac{p(\neg_i \mathbf{x}_c' \mid \mathbf{x}_s')}{p(\mathbf{x}_c' \mid \mathbf{x}_s')} k(\neg_i \mathbf{x}, \mathbf{x}') \\ &\quad + k(\neg_i \mathbf{x}, \neg_i \mathbf{x}'). \end{aligned}$$

By substituting  $k_{p,i}$  into the expected kernel in the expectation of  $k_{p,i}$  with respect to the conditional distributions can be simplified to be a constant zero, that is,

$$\mathbb{E}_{\mathbf{x}_c \sim p(\mathbf{X}_c \mid \mathbf{x}_s), \mathbf{x}_c' \sim p(\mathbf{X}_c \mid \mathbf{x}_s')} [k_{p,i}(\mathbf{x}, \mathbf{x}')] = 0.$$

Thus,  $k_{p,s}$  can be expanded as

$$\begin{aligned} k_{p,s}(\mathbf{x}, \mathbf{x}') &= \mathbb{E}_{\mathbf{x}_c \sim p(\mathbf{X}_c \mid \mathbf{x}_s), \mathbf{x}_c' \sim p(\mathbf{X}_c \mid \mathbf{x}_s')} \left[ \sum_{i \in \mathbf{s}} k_{p,i}(\mathbf{x}, \mathbf{x}') \right] \\ &= \sum_{i \in \mathbf{s}} \left[ \frac{p(\neg_i \mathbf{x}_s) p(\neg_i \mathbf{x}_s')}{p(\mathbf{x}_s) p(\mathbf{x}_s')} \cdot M_{k(\cdot, \cdot)}(p(\cdot \mid \neg_i \mathbf{x}_s), p(\cdot \mid \neg_i \mathbf{x}_s')) \right. \\ &\quad - \frac{p(\neg_i \mathbf{x}_s)}{p(\mathbf{x}_s)} \cdot M_{k(\cdot, \neg_i \cdot)}(p(\cdot \mid \neg_i \mathbf{x}_s), p(\cdot \mid \mathbf{x}_s')) \\ &\quad - \frac{p(\neg_i \mathbf{x}_s')}{p(\mathbf{x}_s')} \cdot M_{k(\neg_i \cdot, \cdot)}(p(\cdot \mid \mathbf{x}_s), p(\cdot \mid \neg_i \mathbf{x}_s')) \\ &\quad \left. + M_{k(\neg_i \cdot, \neg_i \cdot)}(p(\cdot \mid \mathbf{x}_s), p(\cdot \mid \mathbf{x}_s')) \right]. \end{aligned}$$

As Theorem 4.3 has shown that  $M_k(p, q)$  can be computed exactly in time linear in the size of each PC,  $k_{p,s}(\mathbf{x}, \mathbf{x}')$  can also be computed exactly in time  $\mathcal{O}(|p_1| |p_2| |k|)$ , where  $p_1$  and  $p_2$  denote circuits that represent the conditional probability distribution given the index set, i.e.,  $p(\cdot \mid \mathbf{x}_s)$  or  $p(\cdot \mid \neg_i \mathbf{x}_s)$ . □

## 2 ALGORITHMS

Algorithm 1 summarizes how to perform the BBIS scheme we propose for Categorical distributions, and generate a set of weighted samples.

---

**Algorithm 1** CATEGORICALBBIS( $p, q, k, n$ )

---

**Input:** target distributions  $p$  over variables  $\mathbf{X}$ , a black-box mechanism  $q$ , a kernel function  $k$  and number of samples  $n$

**Output:** weighted samples  $\{(\mathbf{x}^{(i)}, w_i^*)\}_{i=1}^n$

- 1: Sample  $\{\mathbf{x}^{(i)}\}_{i=1}^n$  from  $q$
  - 2: **for**  $i = 1, \dots, n$  **do**
  - 3:     **for**  $j = 1, \dots, n$  **do**
  - 4:          $[\mathbf{K}_p]_{ij} = k_p(\mathbf{x}^{(i)}, \mathbf{x}^{(j)})$       $\triangleright$  cf. Section 5.2
  - 5:  $\mathbf{w}^* = \arg \min_{\mathbf{w}} \{ \mathbf{w}^\top \mathbf{K}_p \mathbf{w} \mid \sum_{i=1}^n w_i = 1, w_i \geq 0 \}$
  - 6: **return**  $\{(\mathbf{x}^{(i)}, w_i^*)\}_{i=1}^n$
-
